# Supplementary material for: Molecular Detection Mapping and Analysis Platform for R (MDMAPR) facilitating the standardization, analysis, visualization, and sharing of qPCR data and metadata
Source: PeerJ. 2020 Oct 23;8:e9974. doi: 10.7717/peerj.9974 (PMC7587055; doi:10.7717/peerj.9974)
Supplement: File S1 [file peerj-08-9974-s001.xlsx]

## Sheet: Sheet1
run_location	run_platform	threshold	primer_seq	target_gene	basisofRecord	recordedBy	establishmentMeans	associatedTaxa	organismScope	eventDate	eventRemarks	continent	country	stateProvince	locality	minimumElevationInMeters	maximumElevationInMeters	minimumDepthInMeters	maximumDepthInMeters	verbatimElevation	verbatimDepth	decimalLatitude	decimalLongtitude	coordinateUncertaintyInMeters	taxonID	kingdom	phylum	class	order	family	genus	species	vernacularName
Example Row (Delete this row before upload.)	Biomeme23	0.0319547		16S rRNA	surface water sample	John Doe	invasive		Bacteria	43535	The river is at flood stage due to recent heavy rains.	North America	Canada	British Columbia		334	334	0	0	334	0	49.3041	-123.206	3	701179	Eubacteria	Proteobacteria	Gammaproteobacteria	Vibrionales	Vibrionaceae	Vibrio	Vibrio vulnificus	N/A
